# Supplementary material for: A Comparative Metabolomics Analysis Reveals the Tissue-Specific Phenolic Profiling in Two Acanthopanax Species
Source: PubMed Central journal article supplement (PMC6222473; doi:10.3390/molecules23082078), 2018-08-20
Supplement: molecules-23-02078-s001.pdf [file molecules-23-02078-s001.pdf]

Table S1. The regression equations, linear range, LODs and LOQs the tested compounds

| Metabolites     | Range<br>(ng/mL) | Calibration curves  | Correlation<br>coefficient ( <i>r</i> ) | Limit of<br>detection<br>(ng/mL) | Limit of<br>quantitation<br>(ng/mL) |
|-----------------|------------------|---------------------|-----------------------------------------|----------------------------------|-------------------------------------|
| Protocatechuate | 0.1-1000         | Y= 292.4x + 10111   | 0.9997                                  | 0.045                            | 0.1                                 |
| Hyperoside      | 0.1-1000         | Y=6290.3x + 2E+06   | 0.9990                                  | 0.045                            | 0.1                                 |
| Isoraxidin      | 0.1-1000         | Y=250.87x - 44.444  | 1.0000                                  | 0.045                            | 0.1                                 |
| Oleanolic acid  | 1-10000          | Y=27.767x + 56290   | 0.9998                                  | 0.450                            | 1.0                                 |
| Eleutheroside B | 1-10000          | Y= 3241.1x - 9252.4 | 1.0000                                  | 0.450                            | 1.0                                 |
| Eleutheroside E | 1-10000          | Y = 502.3x + 30434  | 0.9997                                  | 0.450                            | 1.0                                 |
| Kaempferol      | 0.1-1000         | Y=3031.7x - 8055.6  | 0.9999                                  | 0.045                            | 0.1                                 |

Y indicates the peak area;X indicates the concentration.

Table S2. The intra-day and inter-day precision, accuracy and repeatability analysis of Protocatechuate, Hyperoside, Isofraxidin, Oleanolic acid, Eleutheroside B, Eleutheroside E and Kaempferol at low, medium, and high concentration levels (n=6).

| Metabolites     | Nominal concentrations (ng/mL) | Intra-day                                 |                             | Inter-day                                 |                             | Repeatability (relative standard deviation %) |
|-----------------|--------------------------------|-------------------------------------------|-----------------------------|-------------------------------------------|-----------------------------|-----------------------------------------------|
|                 |                                | Precision (relative standard deviation %) | Accuracy (relative error %) | Precision (relative standard deviation %) | Accuracy (relative error %) |                                               |
| Protocatechuate | 8                              | 0.82%                                     | -0.45%                      | 0.95%                                     | 1.69%                       | 1.46%                                         |
|                 | 80                             | 1.20%                                     | -1.02%                      | 1.20%                                     | -1.02%                      | 1.15%                                         |
|                 | 800                            | 0.42%                                     | -0.23%                      | 0.46%                                     | -0.36%                      | 0.58%                                         |
| Hyperoside      | 8                              | 0.24%                                     | 0.15%                       | 0.47%                                     | -0.08%                      | 0.61%                                         |
|                 | 80                             | 0.37%                                     | 0.24%                       | 0.65%                                     | 0.86%                       | 0.32%                                         |
|                 | 800                            | 1.33%                                     | -0.16%                      | 1.32%                                     | 0.73%                       | 0.82%                                         |
| Isofraxidin     | 8                              | 0.51%                                     | -1.03%                      | 0.91%                                     | 0.37%                       | 1.12%                                         |
|                 | 80                             | 1.71%                                     | 0.95%                       | 1.35%                                     | 0.56%                       | 0.78%                                         |
|                 | 800                            | 0.59%                                     | -0.24%                      | 1.38%                                     | -0.56%                      | 0.98%                                         |
| Oleanolic acid  | 80                             | 0.81%                                     | 0.33%                       | 1.11%                                     | 0.42%                       | 1.42%                                         |
|                 | 800                            | 0.33%                                     | 0.14%                       | 0.21%                                     | -0.08%                      | 0.75%                                         |
|                 | 8000                           | 1.07%                                     | -0.44%                      | 1.30%                                     | -0.53%                      | 1.92%                                         |
| Eleutheroside B | 80                             | 0.67%                                     | -0.27%                      | 0.50%                                     | 0.20%                       | 1.00%                                         |
|                 | 800                            | 0.14%                                     | 0.06%                       | 0.86%                                     | -0.35%                      | 0.77%                                         |
|                 | 8000                           | 0.60%                                     | 0.25%                       | 0.90%                                     | 0.37%                       | 0.45%                                         |
| Eleutheroside E | 80                             | 0.74%                                     | -0.40%                      | 0.75%                                     | 0.31%                       | 0.37%                                         |
|                 | 800                            | 0.58%                                     | 0.30%                       | 0.98%                                     | 0.40%                       | 0.79%                                         |
|                 | 8000                           | 0.96%                                     | -0.48%                      | 0.58%                                     | 0.24%                       | 0.51%                                         |
| Kaempferol      | 8                              | 0.61%                                     | 0.25%                       | 0.86%                                     | 0.35%                       | 0.86%                                         |
|                 | 80                             | 1.08%                                     | -0.44%                      | 0.54%                                     | -0.22%                      | 0.29%                                         |
|                 | 800                            | 0.23%                                     | 0.00%                       | 0.65%                                     | -0.26%                      | 1.13%                                         |

Table S3 The content of seven major bioactive compounds in different parts of ASH and ASS

|   | (µg/g)          | ASH     |        |        | ASS    |        |        |
|---|-----------------|---------|--------|--------|--------|--------|--------|
|   |                 | Root    | Stem   | Leaf   | Root   | Stem   | Leaf   |
| 1 | Eleutheroside E | 5.1908  | 3.6508 | 0.0683 | 6.0908 | 1.5408 | 0.0294 |
| 2 | Oleanolic acid  | 8.2408  | 4.5741 | 3.0875 | 2.3741 | 2.5741 | 2.5075 |
| 3 | Kaempferol      | 0.0069  | 0.0039 | 0.0102 | 0.0102 | 0.0098 | 0.0115 |
| 4 | Isofraxidin     | 1.2402  | 2.1402 | 0.0251 | 0.0091 | 0.0196 | 0.0070 |
| 5 | Protocatechuate | 0.1189  | 0.3802 | 2.2516 | 0.3362 | 1.8716 | 3.9516 |
| 6 | Eleutheroside B | 16.4062 | 7.9395 | 0.0922 | 0.1622 | 0.0677 | 0.0875 |
| 7 | Hyperoside      | 0.0007  | 0.0050 | 0.3700 | 0.0004 | 0.0040 | 0.0030 |

Table S4 The data of 19 phenolic compounds heat map

| id                                | WR    | WR    | WR    | WS    | WS    | WS    | WL    | WL    | WL    | AR    | AR    | AR    | AS    | AS    | AS    | AL    | AL    | AL    |
|-----------------------------------|-------|-------|-------|-------|-------|-------|-------|-------|-------|-------|-------|-------|-------|-------|-------|-------|-------|-------|
| <i>p</i> -Hydroxycinnamic acid    |       | 0.489 | 0.593 | 0.718 | 0.473 | 0.282 |       | 0.000 | 0.000 | 0.082 | 0.098 | 0.080 | 0.098 | 0.078 | 0.095 | 0.012 | 0.005 | 0.003 |
|                                   | 1     | 2     | 851   | 083   | 857   | 686   | 0     | 186   | 593   | 479   | 312   | 404   | 003   | 175   | 753   | 603   | 838   | 095   |
| Genistein                         | 0.275 | 0.193 | 0.152 | 0.049 | 0.090 | 0.119 | 0.343 | 0.420 | 0.229 |       | 0.624 | 0.844 | 0.532 | 0.214 | 0.321 | 0.652 | 0.695 | 0.677 |
|                                   | 723   | 823   | 284   | 467   | 409   | 275   | 194   | 196   | 634   | 1     | 536   | 395   | 614   | 69    | 994   | 038   | 852   | 862   |
| Apigenin                          | 0.297 | 0.210 | 0.157 | 0.089 | 0.127 | 0.155 | 0.359 | 0.429 | 0.254 |       | 0.660 | 0.825 | 0.505 | 0.273 | 0.370 | 0.672 | 0.718 | 0.693 |
|                                   | 702   | 683   | 941   | 644   | 6     | 193   | 416   | 223   | 936   | 1     | 25    | 846   | 048   | 414   | 79    | 725   | 611   | 515   |
| Syringic acid                     | 0.614 |       | 0.583 | 0.154 |       | 0.351 | 0.002 | 0.000 |       | 0.219 | 0.273 | 0.249 | 0.048 | 0.044 | 0.039 | 0.014 | 0.011 | 0.005 |
|                                   | 481   | 1     | 805   | 852   | 0.261 | 15    | 382   | 859   | 0     | 295   | 204   | 622   | 206   | 162   | 36    | 386   | 507   | 683   |
| Petunidin                         | 0.016 | 0.014 | 0.014 | 0.176 | 0.224 | 0.182 | 0.013 | 0.022 | 0.018 | 0.003 |       | 0.054 | 0.885 | 0.868 | 0.908 | 0.098 | 0.115 | 0.126 |
|                                   | 037   | 06    | 375   | 779   | 053   | 621   | 654   | 89    | 278   | 504   | 0     | 358   | 108   | 362   | 461   | 07    | 813   | 859   |
| Naringenin                        | 0.048 | 0.203 | 0.065 | 0.516 | 0.743 | 0.586 | 0.596 | 0.470 | 0.499 | 0.680 | 0.774 | 0.779 | 0.428 | 0.218 | 0.193 | 0.982 | 0.895 | 0.632 |
|                                   | 571   | 501   | 786   | 026   | 233   | 333   | 476   | 991   | 855   | 056   | 532   | 227   | 795   | 165   | 532   | 959   | 67    | 991   |
| Quercetin-3- <i>O</i> -rhamnoside | 0.001 | 0.007 |       | 0.049 | 0.065 | 0.053 |       | 0.946 | 0.886 | 0.009 | 0.003 | 0.008 | 0.085 | 0.102 | 0.056 | 0.071 | 0.044 | 0.040 |
|                                   | 795   | 933   | 0     | 375   | 994   | 567   | 1     | 599   | 501   | 561   | 876   | 913   | 117   | 43    | 629   | 619   | 187   | 658   |
| Chlorogenic acid                  |       | 0.803 | 0.781 | 0.659 | 0.849 | 0.817 | 0.008 | 0.007 | 0.007 | 0.537 | 0.494 | 0.510 | 0.027 | 0.028 | 0.026 |       | 0.000 | 0.000 |
|                                   | 1     | 851   | 116   | 277   | 058   | 315   | 441   | 413   | 182   | 655   | 117   | 119   | 55    | 241   | 529   | 0     | 433   | 628   |
| Salicylic acid                    | 0.033 | 0.046 | 0.077 |       | 0.000 | 0.005 | 0.129 | 0.130 | 0.073 | 0.063 | 0.085 | 0.069 | 0.716 | 0.606 | 0.537 |       | 0.798 | 0.765 |
|                                   | 783   | 575   | 342   | 0     | 573   | 254   | 069   | 317   | 295   | 376   | 581   | 496   | 635   | 847   | 65    | 1     | 515   | 153   |
| Ferulic acid                      |       | 0.898 | 0.910 | 0.456 | 0.499 | 0.580 | 0.001 |       | 0.006 | 0.949 | 0.810 | 0.756 | 0.097 | 0.130 | 0.134 | 0.039 | 0.015 | 0.023 |
|                                   | 1     | 987   | 039   | 444   | 98    | 536   | 813   | 0     | 787   | 041   | 463   | 041   | 818   | 091   | 55    | 686   | 201   | 666   |
| Myricitrin                        | 0.001 | 0.008 | 0.009 | 0.071 | 0.163 | 0.061 |       | 0.971 | 0.804 | 0.004 | 0.004 | 0.004 | 0.031 | 0.022 | 0.022 | 0.003 | 0.001 |       |
|                                   | 775   | 033   | 517   | 97    | 201   | 593   | 1     | 385   | 506   | 552   | 706   | 826   | 275   | 57    | 378   | 193   | 26    | 0     |
| Luteolin                          | 0.478 | 0.460 | 0.527 | 0.233 | 0.253 | 0.217 | 0.024 | 0.023 | 0.014 | 0.585 | 0.594 | 0.478 | 0.041 | 0.027 | 0.024 | 0.000 | 0.003 | 0     |

|                         |       |       |       |       |       |       |       |       |       |       |       |       |       |       |       |       |       |       |
|-------------------------|-------|-------|-------|-------|-------|-------|-------|-------|-------|-------|-------|-------|-------|-------|-------|-------|-------|-------|
|                         | 992   | 349   | 288   | 455   | 562   | 404   | 669   | 374   | 447   | 976   | 537   | 485   | 678   | 936   | 838   | 253   | 774   |       |
| Catechin                | 0.826 | 0.515 | 0.588 | 0.636 |       | 0.842 | 0.010 | 0.005 | 0.017 | 0.833 | 0.364 | 0.388 | 0.007 | 0.005 | 0.009 | 0.001 |       | 0.002 |
|                         | 129   | 64    | 077   | 618   | 1     | 729   | 092   | 313   | 155   | 191   | 406   | 431   | 19    | 078   | 9     | 579   | 0     | 859   |
| Cinnamic acid           | 0.236 | 0.241 | 0.155 | 0.144 | 0.267 | 0.182 | 0.050 | 0.008 | 0.002 |       | 0.824 | 0.691 | 0.337 | 0.349 | 0.356 | 0.082 | 0.007 | 0.047 |
|                         | 783   | 952   | 344   | 229   | 003   | 172   | 491   | 624   | 041   | 1     | 412   | 37    | 879   | 625   | 092   | 099   | 904   | 669   |
| <i>p</i> -Coumaric acid |       | 0.830 | 0.718 | 0.786 | 0.753 | 0.793 | 0.002 |       | 0.024 | 0.034 | 0.013 | 0.028 | 0.174 | 0.109 | 0.068 | 0.027 | 0.009 | 0.004 |
|                         | 1     | 964   | 588   | 693   | 815   | 545   | 221   | 0     | 138   | 392   | 523   | 28    | 336   | 818   | 765   | 27    | 485   | 835   |
| Quercetin               |       | 0.852 | 0.802 | 0.508 | 0.480 | 0.405 | 0.251 | 0.168 | 0.322 | 0.564 | 0.751 | 0.800 | 0.013 | 0.127 | 0.188 | 0.198 | 0.089 |       |
|                         | 1     | 725   | 991   | 87    | 412   | 166   | 836   | 391   | 097   | 5     | 38    | 472   | 291   | 82    | 435   | 349   | 93    | 0     |
| Gallic acid             | 0.263 | 0.302 | 0.259 | 0.271 | 0.333 | 0.145 | 0.155 | 0.266 | 0.254 | 0.363 | 0.263 | 0.449 | 0.066 |       | 0.076 | 0.086 | 0.207 | 0.108 |
|                         | 775   | 809   | 855   | 939   | 616   | 612   | 474   | 608   | 762   | 438   | 463   | 07    | 072   | 0     | 532   | 381   | 814   | 289   |
| Caffeic acid            |       | 0.699 | 0.812 | 0.321 | 0.272 | 0.311 | 0.002 | 0.002 | 0.002 | 0.485 | 0.385 | 0.500 | 0.006 | 0.013 | 0.016 | 0.001 |       | 0.001 |
|                         | 1     | 002   | 356   | 191   | 864   | 362   | 187   | 064   | 55    | 48    | 117   | 781   | 706   | 082   | 619   | 104   | 0     | 125   |
| Vanillic acid           | 0.921 |       | 0.863 | 0.043 | 0.127 | 0.154 | 0.016 | 0.046 |       | 0.188 | 0.285 | 0.350 | 0.125 | 0.039 | 0.120 | 0.063 | 0.111 | 0.043 |
|                         | 417   | 1     | 879   | 52    | 98    | 78    | 602   | 921   | 0     | 177   | 733   | 033   | 259   | 179   | 79    | 781   | 537   | 299   |
